# Supplementary material for: Pharmacist-Led Management Model and Medication Adherence Among Patients With Chronic Heart Failure: A Randomized Clinical Trial
Source: PubMed Central journal article supplement (PMC11662253; doi:10.1001/jamanetworkopen.2024.53976), 2024-12-20
Supplement: jamanetwopen-e2453976-s002.pdf [file jamanetwopen-e2453976-s002.pdf]

## Supplemental Online Content

Wang L, Zhao Y, Han L, et al. Pharmacist-led management model and medication adherence among patients with chronic heart failure: a randomized clinical trial. *JAMA Netw Open*. 2024;7(12):e2453976. doi:10.1001/jamanetworkopen.2024.53976

**eTable 1.** The Outcomes of Morisky Scores and MLHFQ Scores

**eTable 2.** Safety Outcomes

**eTable 3.** All-Cause Deaths and Unplanned Cardiovascular Hospitalizations During 52-Week Follow-Up

This supplemental material has been provided by the authors to give readers additional information about their work.

**eTable 1. The outcomes of Morisky scores and MLHFQ scores**

| <b>Outcome</b>               | <b>Intervention group<br/>(n = 223)</b> | <b>Control group<br/>(n =222)</b> | <b>P value</b> |
|------------------------------|-----------------------------------------|-----------------------------------|----------------|
| Morisky scores, Median (IQR) | 7.8 (6.8-8.0)                           | 7.3 (4.5-7.8)                     | 0.001          |
| MLHFQ scores, Median (IQR)   | 25.0 (12.0-40.0)                        | 35.0 (20.0-44.0)                  | 0.005          |

Abbreviations:

MLHFQ, Minnesota Living with Heart Failure Questionnaire; IQR, interquartile range.

**eTable 2. Safety outcomes**

| <b>NO.</b> | <b>Intervention group<br/>(n = 223)</b> | <b>Control group<br/>(n =222)</b> | <b>P value</b> |
|------------|-----------------------------------------|-----------------------------------|----------------|
| AEs        | 19                                      | 15                                | 0.48           |
| No AE      | 204                                     | 207                               |                |

Abbreviations:AEs, adverse events.

**eTable 3. All-cause deaths and unplanned cardiovascular hospitalizations during 52-week follow-up**

| <b>Events</b>                                                           | <b>Intervention<br/>group<br/>(n = 223)</b> | <b>Control group<br/>(n =222)</b> | <b>P<br/>value</b> |
|-------------------------------------------------------------------------|---------------------------------------------|-----------------------------------|--------------------|
| All-cause deaths, n                                                     | 4                                           | 7                                 | 0.36               |
| Unplanned CV hospitalizations, No. %                                    | 59 (26.5)                                   | 65 (29.2)                         | 0.51               |
| Days lost due to unplanned CV hospitalizations and death, mean (95% CI) | 27.3 (13.6-40.9)                            | 33.6 (15.8-51.5)                  | 0.58               |

Abbreviations: CI, confidence interval.
