# Supplementary material for: Pharmacist-Led Management Model and Medication Adherence Among Patients With Chronic Heart Failure: A Randomized Clinical Trial
Source: PubMed Central journal article supplement (PMC11662253; doi:10.1001/jamanetworkopen.2024.53976), 2024-12-20
Supplement: jamanetwopen-e2453976-s003.pdf [file jamanetwopen-e2453976-s003.pdf]

## Data Sharing Statement

Wang. Pharmacist-Led Management Model and Medication Adherence Among Patients With Chronic Heart Failure. *JAMA Netw Open*. Published December 20, 2024.

doi:10.1001/jamanetworkopen.2024.53976

### Data

**Additional Information:** Chinese Clinical Trial Registry Identifier: ChiCTR2000040232

**Data available:** Yes

**Data types:** Deidentified participant data

**How to access data:** [zhouchunhua@hebmu.edu.cn](mailto:zhouchunhua@hebmu.edu.cn)

**When available:** With publication

### Supporting Documents

**Document types:** Informed consent form

**How to access documents:** [zhouchunhua@hebmu.edu.cn](mailto:zhouchunhua@hebmu.edu.cn)

**When available:** With publication

### Additional Information

**Who can access the data:** researchers whose proposed use of the data has been approved

**Types of analyses:** for a specified purpose

**Mechanisms of data availability:** with a signed data access agreement

**Any additional restrictions:** no
